# Supplementary material for: Lack of IL-17 Receptor A signaling aggravates lymphoproliferation in C57BL/6 lpr mice
Source: PubMed Central journal article supplement (PMC6412096; doi:10.1038/s41598-019-39483-w), 2019-03-11
Supplement: 41598_2019_39483_MOESM1_ESM.pdf [file 41598_2019_39483_MOESM1_ESM.pdf]

## Lack of IL-17 Receptor A signaling aggravates lymphoproliferation in C57BL/6 lpr mice

Odilia B.J. Corneth<sup>1,2, †</sup>; Fleur Schaper<sup>†,3</sup>; Franka Luk<sup>1,5</sup>; Patrick S. Asmawidjaja<sup>1</sup>; Adriana M.C. Mus<sup>1</sup>; Gerda Horst<sup>3</sup>; Peter Heeringa<sup>4</sup>; Rudi W. Hendriks<sup>2</sup>, Johanna Westra<sup>3</sup> and Erik Lubberts<sup>1\*</sup>

<sup>1</sup>Department of Rheumatology, Erasmus MC, terdam, The Netherlands

<sup>2</sup>Department of Pulmonary Medicine, Erasmus MC, terdam, The Netherlands

<sup>3</sup>Department  Rheumatology and Clinical Immunology 

<sup>4</sup>ology and Medical Biology, University Medical Center Groningen, roningen, The Netherlands

<sup>5</sup>Current address: phrology and transplantation, Department of Internal Medicine, Erasmus MC, terdam, The Netherlands

<sup>†</sup>Authors contributed equally

**Short title:** IL-17RA signaling limits lymphoproliferation in C57BL/6-lpr mice

This project was funded by the Dutch Arthritis Foundation (Reumafonds, grant no DAA 0801043).

**Correspondence to:** Erik Lubberts, PhD, Department of Rheumatology, Erasmus University Medical Center, Wytemaweg 80, 3015 CN, Rotterdam, The Netherlands. Phone: +31-10-7044309. Email: E.Lubberts@erasmusmc.nl

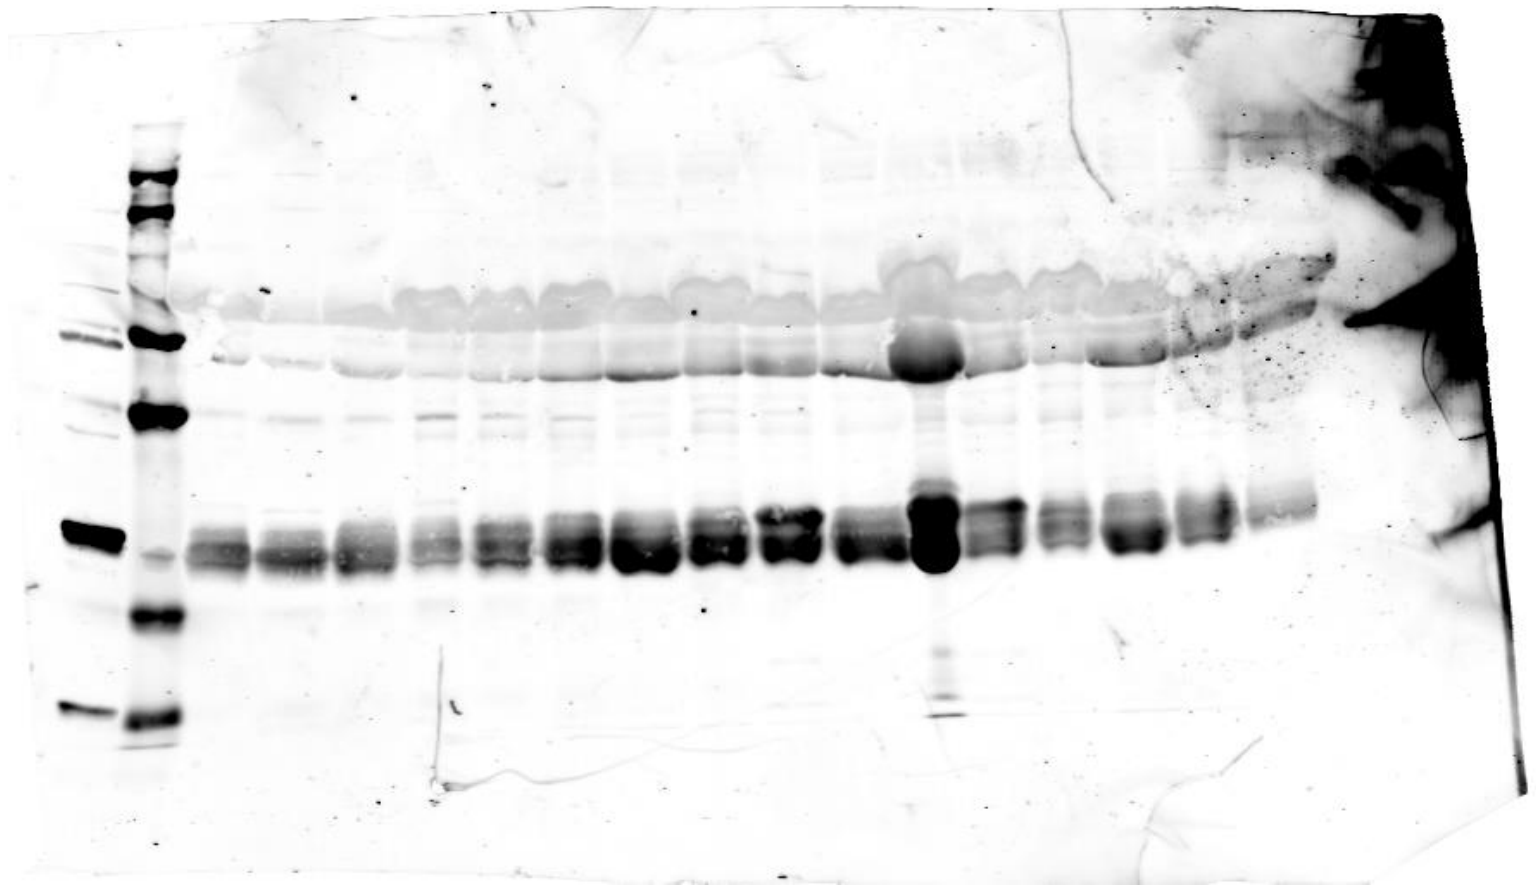

Suppl. Figure 1. Representative Western blot of HMGB1 in sera of lpr mice, 1=positive HMGB1 control, 2=Biorad molecular weight marker, 3-18 mouse lpr sera.
